# Supplementary material for: Strategies for Selecting Routes through Real-World Environments: Relative Topography, Initial Route Straightness, and Cardinal Direction
Source: PLoS One. 2015 May 20;10(5):e0124404. doi: 10.1371/journal.pone.0124404 (PMC4439172; doi:10.1371/journal.pone.0124404)
Supplement: S1 Dataset — For east-west routes, scores of 1, 0, -1 indicate north, none, and south selection biases, respectively. For north-south routes, scores of 1, 0, -1 indicate east, none, and west selection biases, respectively. For diagonal routes, scores of 1, 0, -1 indicate north (NW or NE), noe, and south (SW or SE) selection biases, respectively. For filler routes, scores of 1, 0, -1 indicate north, none, and south selection biases, respectively. (XLSX) [file pone.0124404.s001.xlsx]

## Sheet: East-West Routes
		FLAT				MTN				Nmtn/Sflat				Nflat/Smtn				Emtn/Wflat				Wmtn/Eflat				NEmtn/SWflat				NWmtn/SEflat				SEmtn/NWflat				SWmtn/NEflat
a -1 is south select		BothStraight	BothWindy	Nstraight/Swindy	Sstraight/Nwindy	BothStraight	BothWindy	Nstraight/Swindy	Sstraight/Nwindy	BothStraight	BothWindy	Nstraight/Swindy	Sstraight/Nwindy	BothStraight	BothWindy	Nstraight/Swindy	Sstraight/Nwindy	BothStraight	BothWindy	Nstraight/Swindy	Sstraight/Nwindy	BothStraight	BothWindy	Nstraight/Swindy	Sstraight/Nwindy	BothStraight	BothWindy	Nstraight/Swindy	Sstraight/Nwindy	BothStraight	BothWindy	Nstraight/Swindy	Sstraight/Nwindy	BothStraight	BothWindy	Nstraight/Swindy	Sstraight/Nwindy	BothStraight	BothWindy	Nstraight/Swindy	Sstraight/Nwindy
a 1 is north select		flat_e-w_ss	flat_e-w_ww	flat_e-w_ws	flat_e-w_sw	mtn_e-w_ss	mtn_e-w_ww	mtn_e-w_sw	mtn_e-w_ws	nmsf_e-w_ss	nmsf_e-w_ww	nmsf_e-w_sw	nmsf_e-w_ws	smnf_e-w_ss	smnf_e-w_ww	smnf_e-w_sw	smnf_e-w_ws	emwf_e-w_ss	emwf_e-w_ww	emwf_e-w_sw	emwf_e-w_ws	wmef_e-w_ss	wmef_e-w_ww	wmef_e-w_sw	wmef_e-w_ws	nemswf_e-w_ss	nemswf_e-w_ww	nemswf_e-w_sw	nemswf_e-w_ws	nwmsef_e-w_ss	nwmsef_e-w_ww	nwmsef_e-w_sw	nwmsef_e-w_ws	semnwf_e-w_ss	semnwf_e-w_ww	semnwf_e-w_sw	semnwf_e-w_ws	swmnef_e-w_ss	swmnef_e-w_ww	swmnef_e-w_sw	swmnef_e-w_ws
north red, south blue		flat_w-e_ss	flat_w-e_ww	flat_w-e_sw	flat_w-e_ws	mtn_w-e_ss	mtn_w-e_ww	mtn_w-e_ws	mtn_w-e_sw	nmsf_w-e_ss	nmsf_w-e_ww	nmsf_w-e_ws	nmsf_w-e_sw	smnf_w-e-ss	smnf_w-e_ww	smnf_w-e_ws	smnf_w-e_sw	emwf_w-e_ss	emwf_w-e_ww	emwf_w-e_ws	emwf_w-e_sw	wmef_w-e_ss	wmef_w-e_ww	wmef_w-e_ws	wmef_w-e_sw	nemswf_w-e_ss	nemswf_w-e_ww	nemswf_w-e_ws	nemswf_w-e_sw	nwmsef_w-e_ss	nwmsef_w-e_ww	nwmsef_w-e_ws	nwmsef_w-e_sw	semnwf_w-e_ss	semnwf_w-e_ww	semnwf_w-e_ws	semnwf_w-e_sw	swmnef_w-e_ss	swmnef_w-e_ww	swmnef_w-e_ws	swmnef_w-e_sw
	1	0	0	1	0	-1	0	-1	1	-1	0	-1	-1	1	1	1	1	0	-1	0	1	0	0	-1	-1	0	0	-1	0	-1	-1	-1	-1	1	1	1	1	1	0	0	1
	2	0	-1	1	-1	0	1	0	0	0	0	1	-1	-1	0	1	-1	1	-1	-1	1	0	1	1	-1	-1	0	1	0	1	1	1	-1	0	0	1	-1	1	1	0	0
	3	-1	-1	1	-1	0	0	1	-1	1	-1	1	-1	1	1	1	-1	0	1	1	-1	1	#DIV/0!	1	-1	-1	#DIV/0!	0	0	1	-1	1	-1	#DIV/0!	1	1	0	0	1	1	-1
	4	1	0	0	1	na	1	1	1	-1	-1	0	-1	1	1	1	0	1	1	1	1	0	1	#DIV/0!	0	1	1	#DIV/0!	-1	0	1	0	1	1	1	1	-1	1	1	1	1
	5	1	-1	-1	0	1	1	0	-1	-1	0	-1	1	na	-1	-1	-1	0	-1	-1	-1	0	1	1	0	0	1	0	0	0	1	1	1	1	-1	0	0	0	-1	0	1
	6	0	1	1	1	0	1	0	1	1	0	0	-1	-1	0	0	0	0	-1	0	-1	0	0	0	-1	1	0	1	-1	0	0	1	-1	1	0	1	0	-1	0	0	-1
	7	-1	1	1	-1	1	-1	1	-1	0	-1	0	-1	-1	1	1	-1	-1	1	1	1	0	-1	0	-1	-1	1	1	-1	0	1	1	-1	1	0	1	-1	1	0	1	0
	8	0	-1	-1	0	1	0	1	1	0	1	1	0	-1	0	1	-1	1	-1	1	0	1	1	1	-1	0	1	-1	0	-1	1	1	1	1	1	1	-1	0	1	1	0
	9	0	1	1	0	1	0	1	1	0	-1	0	-1	-1	1	1	0	0	-1	1	0	-1	0	1	-1	0	-1	0	-1	-1	-1	1	-1	1	-1	1	-1	0	0	1	1
	10	1	1	-1	0	0	0	-1	1	1	0	0	0	-1	0	0	0	1	1	0	1	-1	1	0	0	0	1	-1	1	-1	1	0	0	1	0	0	-1	0	1	0	0
	11	-1	1	1	-1	1	1	1	-1	1	0	0	-1	-1	-1	1	0	1	0	1	-1	-1	0	1	-1	0	-1	1	-1	-1	0	0	-1	1	-1	1	-1	0	0	-1	0
	12	-1	-1	1	0	0	0	-1	0	-1	-1	-1	0	1	1	1	1	0	1	1	1	1	0	0	-1	-1	-1	0	-1	-1	-1	0	1	1	1	1	1	1	0	0	1
	13	1	0	1	0	0	1	-1	-1	-1	1	1	-1	-1	0	1	0	1	0	1	-1	1	1	1	-1	1	0	1	-1	0	0	1	-1	1	1	na	-1	-1	1	1	1
	14	0	1	0	-1	1	0	1	1	1	1	0	-1	-1	1	0	0	0	0	0	na	0	1	-1	0	0	-1	1	0	-1	0	1	-1	na	0	0	1	1	0	0	1
	15	0	1	1	0	1	0	-1	0	0	0	0	-1	-1	1	1	-1	1	1	1	0	1	0	0	1	0	0	0	-1	-1	0	0	-1	1	0	1	0	0	0	1	0
	16	1	1	0	0	0	0	1	1	-1	-1	-1	-1	1	1	1	0	1	1	1	0	0	0	0	0	1	-1	-1	-1	-1	-1	1	-1	1	1	1	0	0	1	0	1
	17	0	0	0	0	0	0	1	0	0	-1	-1	-1	1	0	1	0	0	-1	0	1	0	1	0	0	0	-1	0	0	-1	1	0	0	1	0	0	0	0	1	1	1
	18	1	0	0	1	1	0	0	1	0	1	-1	-1	-1	1	0	0	0	0	-1	1	1	0	-1	1	0	1	-1	1	-1	1	0	1	1	0	0	-1	1	1	-1	1
	19	-1	1	0	0	0	1	1	-1	-1	0	1	-1	-1	0	0	0	-1	-1	-1	0	1	-1	0	-1	-1	0	1	0	-1	1	1	0	-1	-1	1	-1	-1	0	1	0
	20	1	1	0	-1	0	1	1	1	1	0	1	-1	-1	1	1	1	1	1	0	1	0	1	0	0	-1	1	-1	1	0	0	1	0	1	1	0	0	0	1	1	1
	21	0	1	1	-1	0	-1	0	1	0	0	0	0	-1	0	1	-1	0	-1	1	-1	-1	1	1	-1	0	0	-1	-1	-1	0	1	-1	1	1	1	-1	0	0	1	1
	22	0	1	1	-1	1	0	0	0	1	1	1	0	1	0	1	-1	1	0	1	1	0	1	1	0	1	-1	0	1	-1	1	1	-1	1	1	1	-1	-1	0	1	0
	23	0	1	1	-1	0	1	0	0	0	1	1	-1	-1	0	1	-1	0	-1	1	1	0	1	1	0	0	-1	0	-1	-1	1	1	-1	1	1	1	-1	0	0	1	1
	24	0	0	1	-1	-1	0	na	-1	-1	1	1	na	1	-1	0	1	1	-1	-1	-1	1	1	-1	1	0	1	1	1	0	1	-1	1	1	0	0	-1	1	-1	-1	0
	25	0	-1	-1	-1	0	1	-1	-1	0	-1	-1	0	-1	0	-1	0	0	0	-1	-1	-1	0	-1	0	-1	0	0	0	-1	1	1	0	0	0	0	-1	-1	0	-1	1
	26	1	0	0	0	1	1	0	1	1	0	1	-1	1	0	1	0	1	1	1	1	-1	0	1	1	1	1	1	0	1	1	1	0	0	1	1	0	1	0	-1	1
	27	0	0	0	-1	1	1	1	-1	0	-1	-1	0	1	1	1	-1	-1	-1	-1	1	-1	-1	-1	0	-1	-1	1	0	-1	0	1	-1	1	0	0	-1	-1	0	0	1
	28	1	1	-1	0	0	1	0	-1	1	0	1	-1	1	1	1	-1	0	1	1	-1	1	1	1	0	-1	1	1	0	1	1	1	-1	1	0	1	0	-1	1	1	1
	29	0	1	-1	-1	0	0	0	0	0	-1	0	-1	1	1	1	1	1	-1	0	0	0	0	0	0	0	-1	0	0	0	0	-1	-1	1	1	1	1	0	1	1	1
	30	-1	0	0	0	-1	0	1	0	0	1	0	0	-1	-1	-1	-1	0	1	0	0	-1	-1	0	-1	1	1	0	0	0	0	1	0	0	-1	0	0	0	0	0	-1
	31	-1	1	1	-1	1	1	1	1	1	-1	0	0	1	0	1	0	0	0	0	0	0	1	0	0	-1	0	-1	-1	-1	0	1	-1	1	0	1	-1	-1	0	0	-1
	32	-1	0	0	1	0	1	-1	1	1	1	1	-1	1	1	0	1	0	1	-1	1	-1	1	1	1	0	0	0	1	0	1	0	0	1	1	1	1	0	1	0	1
	33	0	1	0	-1	-1	0	1	1	1	-1	0	0	-1	0	1	0	1	1	1	0	0	1	0	1	1	0	0	-1	0	0	1	-1	-1	0	0	0	0	0	1	1
	34	1	1	0	0	0	1	-1	1	0	0	1	1	-1	0	0	1	-1	1	-1	1	1	0	0	0	1	1	0	1	1	0	0	0	1	-1	0	0	0	0	0	1
	35	1	1	1	1	1	1	0	0	-1	-1	1	0	1	0	0	1	0	1	1	0	-1	1	1	0	1	0	1	1	-1	0	1	0	0	0	-1	0	0	0	1	-1
	36	1	1	1	-1	1	0	-1	1	0	1	1	-1	1	0	1	0	0	-1	1	-1	0	1	1	0	0	0	1	-1	-1	0	0	1	1	1	1	-1	0	1	1	0
	37	-1	1	1	1	0	0	0	-1	-1	-1	-1	-1	1	1	1	1	-1	0	0	1	0	-1	-1	1	1	-1	-1	-1	-1	-1	1	-1	1	1	1	1	1	1	0	1
	38	0	0	1	0	0	1	1	0	0	0	1	-1	1	0	1	-1	1	0	1	-1	0	1	0	0	1	0	0	0	0	-1	1	-1	1	1	1	1	1	-1	1	0
	39	-1	1	0	-1	-1	-1	0	-1	-1	-1	1	-1	1	-1	1	1	1	-1	0	-1	0	1	na	-1	-1	-1	-1	-1	-1	0	1	-1	1	1	na	0	0	-1	0	-1
	40	1	1	1	-1	0	0	1	0	0	0	-1	-1	1	1	1	1	0	0	1	1	1	0	0	-1	-1	-1	-1	-1	-1	-1	-1	-1	1	1	1	0	0	0	1	-1
	41	0	1	0	1	0	1	1	-1	1	-1	1	0	1	0	1	1	-1	1	1	1	0	1	1	0	1	1	-1	-1	1	0	1	1	1	1	1	1	1	0	1	1
	42	0	1	0	-1	0	0	0	1	-1	-1	-1	-1	1	1	1	1	-1	0	1	1	1	-1	-1	0	-1	-1	-1	-1	-1	-1	0	0	1	1	1	0	1	0	1	1
	43	0	-1	0	-1	1	0	1	0	-1	-1	-1	-1	1	1	1	1	-1	0	0	1	1	0	0	1	-1	-1	0	0	-1	-1	0	-1	1	1	1	1	1	0	1	1
	44	1	1	0	1	0	1	0	0	0	-1	0	0	-1	0	1	0	1	-1	1	0	-1	1	0	1	1	1	-1	0	-1	-1	1	0	1	-1	1	1	-1	0	-1	1
	45	0	0	0	1	0	1	-1	1	1	1	0	1	1	0	0	0	1	1	-1	1	0	1	1	1	1	1	1	1	1	0	1	1	0	0	0	0	1	0	0	1
	46	0	1	1	-1	1	1	-1	1	1	-1	0	0	-1	0	1	0	1	1	0	0	0	1	0	1	0	0	1	-1	1	0	0	-1	1	1	0	-1	1	-1	1	1
	47	0	1	0	-1	0	0	1	0	-1	-1	-1	-1	1	1	1	1	1	0	0	-1	0	-1	-1	0	-1	-1	-1	-1	-1	-1	-1	-1	1	1	1	1	1	1	0	1
	48	0	1	na	1	-1	1	-1	1	na	1	1	na	-1	1	1	1	0	0	-1	1	-1	1	-1	-1	0	1	-1	1	-1	1	0	0	1	1	0	1	1	0	-1	1
	49	0	-1	0	-1	-1	0	0	-1	-1	-1	0	-1	1	1	1	-1	-1	-1	-1	1	0	-1	-1	-1	0	-1	0	-1	-1	-1	-1	-1	0	1	1	0	1	1	0	0
	50	1	-1	0	0	-1	-1	0	-1	-1	-1	-1	-1	-1	1	1	0	-1	0	0	0	-1	0	-1	-1	-1	0	-1	0	-1	0	0	-1	1	1	1	0	-1	-1	0	1
	51	0	0	0	0	0	1	0	1	1	-1	-1	-1	1	0	0	0	0	0	-1	0	-1	0	1	0	1	0	-1	1	1	1	1	0	0	1	0	1	0	0	-1	-1
	52	0	1	1	-1	-1	0	1	-1	0	0	1	-1	-1	-1	0	-1	0	-1	1	-1	-1	0	1	0	0	0	1	-1	-1	0	1	-1	1	0	1	-1	1	-1	1	0
	53	0	1	1	-1	0	0	0	0	-1	-1	-1	-1	-1	1	1	1	0	0	0	0	0	1	0	-1	1	-1	-1	0	-1	0	0	0	1	1	1	0	1	1	1	0
	54	1	1	0	0	1	1	-1	0	-1	1	0	-1	1	1	0	1	0	0	1	1	-1	1	0	0	1	0	0	1	-1	0	1	0	1	1	1	1	1	0	0	1
	55	1	1	1	1	0	1	-1	1	-1	-1	0	0	-1	0	1	0	0	0	1	0	1	0	1	0	na	0	0	0	1	1	0	0	1	1	1	1	0	0	1	1
	56	0	0	1	0	0	0	0	-1	0	-1	1	-1	1	1	1	-1	0	-1	0	0	-1	-1	-1	-1	0	-1	0	-1	0	0	1	0	0	0	0	-1	0	1	1	0
	57	-1	1	0	1	0	0	0	1	1	0	0	0	-1	0	1	0	1	0	0	1	0	1	1	-1	0	0	0	1	-1	1	1	1	0	0	1	0	1	0	1	1
	58	0	1	0	0	1	1	0	1	1	0	1	1	-1	1	0	1	1	1	0	0	0	1	1	1	1	1	0	1	0	1	1	1	1	1	1	1	0	0	0	1
	59	1	0	0	1	0	1	0	0	0	-1	1	0	-1	1	1	0	0	1	0	0	1	1	1	0	1	0	0	1	0	-1	1	0	1	1	1	-1	1	1	1	0
	60	1	0	-1	0	0	0	-1	1	-1	1	1	1	1	0	-1	0	-1	0	-1	1	1	1	-1	1	0	1	-1	1	-1	1	-1	1	1	0	-1	1	1	0	-1	1
	61	-1	0	1	0	1	0	0	0	1	0	0	-1	-1	0	1	0	0	-1	0	0	0	0	0	-1	0	-1	1	-1	-1	0	1	1	1	1	1	-1	0	0	1	-1
	62	0	1	0	1	1	0	0	1	-1	1	-1	-1	1	1	1	0	1	0	-1	1	-1	1	-1	0	0	-1	0	-1	0	0	0	-1	0	-1	-1	0	0	0	0	1
	63	1	0	1	0	0	1	0	0	0	0	1	0	1	0	1	1	1	0	0	0	1	1	0	1	0	0	1	1	0	0	0	0	1	1	1	0	0	1	0	1
	64	1	0	1	0	1	0	1	1	-1	-1	1	0	1	1	1	0	1	1	1	1	0	-1	0	1	0	0	-1	-1	-1	-1	1	-1	1	1	1	1	1	1	0	1
	65	0	0	0	0	0	0	-1	1	0	-1	0	-1	1	1	0	0	0	-1	-1	0	-1	0	-1	1	1	0	0	0	0	0	-1	-1	0	0	0	-1	-1	-1	0	0
	66	0	0	1	-1	0	0	-1	-1	0	0	1	-1	-1	0	0	-1	1	0	0	-1	-1	1	0	-1	-1	-1	-1	-1	-1	0	1	-1	1	0	1	-1	1	1	0	1
	67	0	-1	1	0	0	1	0	0	0	0	0	1	1	0	0	0	1	-1	0	-1	-1	0	0	-1	0	0	0	0	0	1	1	1	1	-1	0	-1	0	-1	1	0
	68	0	1	1	-1	0	0	-1	1	0	0	-1	-1	-1	-1	-1	1	0	0	1	1	0	0	-1	0	1	-1	-1	1	0	-1	0	-1	0	1	1	1	0	0	-1	1
	69	-1	0	0	0	-1	1	1	-1	-1	-1	-1	-1	1	1	1	0	0	-1	0	0	0	1	0	1	-1	-1	0	-1	-1	-1	1	-1	1	0	1	0	0	1	1	0
	70	0	-1	0	-1	0	1	1	0	-1	-1	-1	-1	1	1	1	1	-1	-1	1	-1	0	-1	-1	0	0	-1	-1	-1	0	-1	-1	-1	1	1	0	0	0	1	0	0
	71	-1	0	0	0	0	1	0	1	1	-1	-1	0	-1	0	0	0	0	0	0	0	0	0	1	1	1	0	-1	1	1	0	0	0	-1	1	0	0	-1	0	0	0
	72	-1	1	-1	0	-1	0	1	1	-1	-1	-1	-1	1	1	1	1	1	-1	-1	1	-1	0	0	0	0	-1	-1	-1	-1	-1	-1	-1	1	-1	0	0	1	1	1	1
	73	0	-1	0	-1	1	0	0	1	1	0	0	-1	1	0	0	0	0	1	1	0	1	0	-1	-1	0	0	-1	0	0	-1	1	0	1	0	1	-1	0	1	-1	0
	74	-1	1	0	-1	0	1	0	1	0	0	0	0	-1	0	1	1	0	0	0	0	0	1	1	0	0	0	1	-1	-1	1	0	-1	1	0	1	-1	0	1	0	1
	75	1	1	1	-1	0	1	0	0	0	-1	-1	-1	1	1	1	1	0	-1	1	0	0	1	-1	0	-1	0	-1	-1	-1	-1	0	0	1	0	1	1	0	1	0	1
	76	1	1	1	1	1	1	1	1	1	1	1	1	-1	-1	0	1	0	0	1	0	0	1	0	1	1	0	0	1	1	-1	1	1	1	0	-1	1	-1	0	0	1
	77	1	1	1	1	0	1	0	0	0	1	0	0	-1	1	1	1	1	0	0	1	-1	1	1	0	0	0	0	1	0	1	1	0	1	0	0	0	0	1	0	1
	78	0	0	0	-1	0	1	1	1	1	-1	0	1	1	1	1	1	0	1	0	1	1	0	-1	-1	0	0	-1	0	0	0	-1	1	1	0	1	0	0	0	1	1
	79	0	0	0	0	-1	1	-1	0	1	1	1	-1	-1	0	0	1	0	-1	0	1	1	0	0	0	0	0	-1	0	-1	1	1	0	0	0	0	-1	-1	-1	1	1
	80	-1	0	0	0	0	0	0	0	-1	-1	-1	-1	1	1	1	1	1	1	1	1	0	0	-1	0	-1	0	0	0	-1	-1	-1	1	1	1	1	-1	1	1	1	1
	81	-1	1	0	0	-1	0	-1	0	1	0	0	0	-1	-1	1	-1	0	0	-1	0	0	0	0	-1	-1	-1	-1	1	-1	-1	0	0	1	0	0	-1	0	0	-1	-1
	82	1	0	1	1	-1	0	0	-1	-1	0	0	-1	1	1	1	-1	0	0	0	1	1	0	-1	-1	0	-1	0	0	0	0	0	-1	1	1	1	1	1	1	0	1
	83	0	0	1	-1	1	0	-1	0	-1	-1	-1	-1	1	1	1	1	1	0	-1	0	0	-1	-1	-1	0	-1	-1	-1	-1	-1	0	-1	1	1	1	1	0	0	0	1
	84	1	-1	0	1	0	1	1	-1	1	0	0	0	1	0	0	-1	-1	0	0	0	-1	0	1	1	-1	1	-1	-1	1	0	0	0	1	1	-1	1	0	0	-1	1
	85	0	1	0	1	1	0	0	0	0	0	1	0	-1	0	1	1	0	0	0	1	0	1	1	0	0	1	-1	0	-1	1	1	0	1	0	1	-1	0	1	0	1
	86	-1	0	-1	1	1	1	0	1	0	0	0	0	1	0	0	0	0	0	-1	0	-1	1	0	1	1	1	1	1	1	0	1	-1	-1	1	1	0	0	-1	-1	1
	87	-1	0	1	-1	1	0	0	-1	1	0	1	0	1	0	1	0	1	-1	0	0	0	0	1	-1	-1	-1	1	0	-1	0	1	-1	1	0	1	-1	1	1	-1	0
	88	-1	1	0	0	0	1	0	-1	0	-1	-1	0	na	0	1	1	-1	-1	-1	0	1	0	0	1	-1	0	0	-1	0	-1	-1	0	1	0	0	0	0	1	-1	1
	89	0	-1	0	-1	-1	0	0	1	1	0	-1	0	-1	-1	0	-1	-1	-1	1	0	-1	1	0	-1	-1	-1	1	1	0	1	0	1	1	0	0	-1	1	1	0	1
	90	-1	-1	0	1	-1	1	1	1	0	1	-1	0	-1	1	0	-1	0	0	na	1	1	0	-1	1	1	1	0	-1	-1	1	1	0	1	1	0	1	na	1	-1	1
	91	0	0	0	-1	1	0	-1	-1	1	-1	-1	0	na	0	0	-1	0	-1	0	-1	0	-1	0	0	0	0	-1	0	1	0	1	0	-1	-1	1	0	0	-1	0	-1
	92	0	0	1	0	-1	1	-1	1	-1	-1	-1	-1	1	1	1	1	0	0	1	0	0	1	1	-1	0	0	0	1	-1	-1	-1	0	1	1	1	1	0	1	1	0
	93	0	0	0	0	0	0	0	0	-1	-1	0	-1	1	0	1	0	-1	-1	0	0	-1	1	-1	0	0	-1	0	-1	-1	-1	-1	-1	1	1	1	1	-1	1	1	0
	94	1	0	1	-1	1	1	1	-1	0	1	1	-1	-1	0	1	-1	1	-1	1	-1	1	1	1	-1	0	-1	1	-1	-1	1	1	0	1	0	1	-1	-1	1	1	0
	95	0	1	-1	0	0	1	-1	1	0	-1	0	0	na	1	0	1	0	0	0	1	0	1	-1	-1	0	0	-1	0	0	1	0	-1	0	0	1	0	0	-1	-1	1
	96	0	0	1	1	0	1	0	1	1	1	0	0	-1	0	0	1	1	-1	0	0	1	1	0	1	0	1	0	1	0	0	1	0	1	1	-1	1	0	0	0	1
	97	0	1	0	-1	0	0	1	1	-1	1	1	1	-1	1	1	0	1	0	0	1	0	0	0	0	0	0	0	1	-1	1	0	0	1	1	1	1	0	1	0	1
	98	1	1	1	1	1	0	0	1	1	1	0	-1	-1	1	1	1	0	-1	1	1	0	1	1	0	0	0	0	0	-1	0	1	1	0	1	1	-1	0	-1	1	0
	99	-1	1	-1	-1	0	0	0	0	0	1	1	0	-1	0	1	-1	1	0	1	-1	0	1	1	0	0	0	1	-1	-1	0	1	-1	1	0	1	-1	0	1	0	0
	100	1	0	0	0	1	0	0	1	0	-1	1	0	-1	1	-1	1	1	0	-1	1	1	1	-1	1	0	0	0	1	0	-1	0	0	1	1	0	1	1	0	0	1

## Sheet: North-South Routes
		FLAT				MTN				Emtn/Wflat				Wmtn/Eflat				Nmtn/Sflat				Smtn/Nflat				NEmtn/SWflat				NWmtn/SEflat				SEmtn/NWflat				SWmtn/NEflat
a -1 is west select		BothStraight	BothWindy	Estraight/Wwindy	Wstraight/Ewindy	BothStraight	BothWindy	Estraight/Wwindy	Wstraight/Ewindy	BothStraight	BothWindy	Estraight/Wwindy	Wstraight/Ewindy	BothStraight	BothWindy	Estraight/Wwindy	Wstraight/Ewindy	BothStraight	BothWindy	Estraight/Wwindy	Wstraight/Ewindy	BothStraight	BothWindy	Estraight/Wwindy	Wstraight/Ewindy	BothStraight	BothWindy	Estraight/Wwindy	Wstraight/Ewindy	BothStraight	BothWindy	Estraight/Wwindy	Wstraight/Ewindy	BothStraight	BothWindy	Estraight/Wwindy	Wstraight/Ewindy	BothStraight	BothWindy	Estraight/Wwindy	Wstraight/Ewindy
a 1 is east select		flat_n-s_ss	flat_n-s_ww	flat_n-s_ws	flat_n-s_sw	mtn_n-s_ss	mtn_n-s_ww	mtn_s-n_sw	mtn_s-n_ws	emwf_n-s_ss	emwf_n-s_ww	emwf_n-s_ws	emwf_n-s_sw	wmef_n-s_ss	wmef_n-s_ww	wmef_n-s_ws	wmef_n-s_sw	nmsf_n-s_ss	nmsf_n-s_ww	nmsf_n-s_ws	nmsf_n-s_sw	smnf_n-s_ss	smnf_n-s_ww	smnf_n-s_ws	smnf_n-s_sw	nemswf_s-n_ss	nemswf_s-n_ww	nemswf_s-n_sw	nemswf_s-n_ws	nwmsef_s-n_ss	nwmsef_s-n_ww	nwmsef_s-n_sw	nwmsef_s-n_ws	semnwf_s-n_ss	semnwf_s-n_ww	semnwf_s-n_sw	semnwf_s-n_ws	swmnef_s-n_ss	swmnef_s-n_ww	swmnef_s-n_sw	swmnef_s-n_ws
east red, west blue		flat_s-n_ss	flat_s-n_ww	flat_s-n_sw	flat_s-n_ws	mtn_s-n_ss	mtn_s-n_ww	mtn_n-s_ws	mtn_n-s_sw	emwf_s-n_ss	emwf_s-n_ww	emwf_s-n_sw	emwf_s-n_ws	wmef_s-n_ss	wmef_s-n_ww	wmef_s-n_sw	wmef_s-n_ws	nmsf_s-n_ss	nmsf_s-n_ww	nmsf_s-n_sw	nmsf_s-n_ws	smnf_s-n_ss	smnf_s-n_ww	smnf_s-n_sw	smnf_s-n_ws	nemswf_n-s_ss	nemswf_n-s_ww	nemswf_n-s_ws	nemswf_n-s_sw	nwmsef_n-s_ss	nwmsef_n-s_ww	nwmsef_n-s_ws	nwmsef_n-s_sw	semnwf_n-s_ss	semnwf_n-s_ww	semnwf_n-s_ws	semnwf_n-s_sw	swmnef_n-s_ss	swmnef_n-s_ww	swmnef_n-s_ws	swmnef_n-s_sw
	1	-1	-1	0	1	1	0	-1	0	-1	-1	-1	-1	1	1	1	1	1	0	-1	1	0	1	1	-1	-1	-1	-1	-1	1	1	1	1	-1	-1	-1	-1	1	1	0	1
	2	-1	0	0	-1	-1	0	1	-1	-1	-1	1	-1	1	-1	1	-1	0	-1	1	-1	-1	-1	1	-1	-1	0	0	1	1	1	1	-1	0	-1	1	-1	0	-1	0	-1
	3	0	1	1	-1	0	0	0	-1	-1	-1	1	-1	0	-1	1	-1	-1	1	1	-1	1	-1	1	-1	-1	0	1	-1	1	0	1	0	0	0	1	0	1	0	0	-1
	4	1	0	1	-1	1	0	0	0	-1	-1	-1	-1	0	1	1	1	0	-1	1	0	-1	1	1	-1	-1	-1	0	-1	1	1	1	0	-1	0	0	0	1	1	1	0
	5	0	0	0	-1	0	-1	1	-1	0	0	0	1	0	0	1	1	1	0	0	0	0	-1	1	0	0	0	0	1	0	0	0	1	0	1	0	1	1	0	1	-1
	6	1	0	1	0	0	0	0	1	0	-1	1	-1	0	0	1	-1	0	-1	1	-1	-1	-1	0	-1	1	-1	1	0	-1	0	1	0	0	-1	1	0	-1	-1	1	-1
	7	0	0	1	-1	0	-1	0	-1	-1	-1	1	-1	0	1	1	-1	0	0	0	-1	0	-1	1	0	0	1	1	0	1	0	1	-1	0	1	1	-1	0	-1	0	-1
	8	-1	-1	1	-1	0	0	1	-1	0	1	1	-1	0	-1	-1	-1	na	na	1	-1	0	-1	1	0	0	0	-1	-1	1	-1	0	0	0	1	1	0	0	-1	1	0
	9	-1	-1	0	-1	-1	-1	1	-1	0	-1	-1	-1	1	0	1	0	0	-1	0	-1	-1	-1	0	-1	-1	-1	1	-1	1	0	0	-1	-1	0	1	-1	0	-1	1	-1
	10	-1	0	0	1	1	0	0	-1	-1	1	0	1	1	0	-1	0	1	-1	1	-1	0	0	0	-1	1	0	1	0	1	1	-1	-1	-1	0	0	1	0	1	1	-1
	11	0	0	1	-1	0	0	1	-1	-1	0	1	-1	0	1	-1	-1	1	0	1	0	-1	-1	0	1	0	-1	1	-1	1	-1	0	-1	0	-1	1	-1	0	0	0	-1
	12	0	1	1	-1	1	1	0	0	-1	-1	-1	-1	1	1	1	1	-1	0	1	0	-1	0	-1	0	-1	-1	-1	-1	1	1	0	1	-1	-1	-1	-1	1	1	1	0
	13	0	1	1	-1	-1	0	1	-1	-1	-1	1	na	-1	1	na	-1	1	1	1	-1	-1	-1	-1	-1	-1	0	1	-1	-1	-1	1	-1	-1	0	1	-1	1	-1	1	-1
	14	1	0	0	0	1	na	0	-1	-1	-1	-1	-1	-1	0	1	-1	1	1	0	0	-1	-1	0	-1	1	0	1	1	1	0	0	-1	-1	0	na	-1	1	0	0	1
	15	0	0	0	0	0	0	1	0	-1	-1	0	-1	0	1	1	1	0	0	0	-1	-1	0	1	-1	-1	-1	0	0	1	0	1	-1	-1	-1	0	-1	0	0	0	-1
	16	0	0	1	-1	0	1	0	1	-1	-1	-1	-1	1	1	1	1	1	1	1	0	0	1	1	-1	0	-1	0	-1	1	1	1	1	-1	-1	-1	-1	1	1	1	0
	17	1	1	0	0	1	-1	0	1	0	-1	0	1	1	1	1	1	0	1	1	-1	-1	-1	1	-1	0	1	1	-1	1	0	0	-1	-1	0	-1	0	0	1	0	0
	18	0	0	-1	0	0	1	-1	1	-1	0	0	1	1	0	-1	1	1	0	-1	1	-1	1	-1	0	0	1	0	0	1	0	-1	-1	0	1	0	1	0	-1	1	-1
	19	-1	0	-1	-1	0	-1	-1	-1	-1	1	-1	-1	-1	0	-1	-1	0	0	0	-1	-1	0	-1	-1	-1	-1	-1	-1	-1	-1	-1	0	-1	0	0	-1	-1	0	0	0
	20	0	0	-1	1	-1	1	0	0	-1	1	1	1	0	0	1	0	0	-1	0	-1	-1	0	-1	-1	1	1	1	0	1	0	-1	0	-1	1	0	-1	1	0	1	0
	21	0	-1	1	0	-1	-1	1	0	0	-1	0	-1	1	1	1	0	-1	-1	1	-1	-1	0	1	-1	-1	0	1	-1	1	0	1	-1	-1	-1	0	-1	1	0	0	0
	22	0	0	0	-1	0	0	1	-1	0	0	1	-1	0	-1	1	-1	0	0	1	-1	-1	0	1	-1	-1	1	1	-1	1	-1	1	-1	-1	0	1	-1	1	-1	0	-1
	23	0	0	0	-1	0	0	0	0	0	-1	1	-1	0	-1	-1	-1	0	0	-1	-1	-1	-1	0	-1	-1	0	1	-1	0	-1	1	-1	-1	0	1	-1	-1	-1	0	-1
	24	1	0	0	0	-1	1	-1	-1	-1	0	0	-1	0	1	na	-1	0	-1	1	0	0	1	-1	0	0	0	1	0	na	-1	-1	0	1	-1	1	1	-1	1	-1	0
	25	0	0	1	-1	-1	1	1	0	0	-1	0	-1	1	0	na	-1	1	0	-1	0	-1	0	0	0	-1	1	1	0	0	0	0	-1	-1	-1	1	-1	0	-1	1	-1
	26	1	0	-1	1	0	0	1	-1	-1	0	1	1	-1	0	1	1	-1	1	1	-1	-1	0	1	0	0	-1	-1	0	0	0	0	0	0	1	0	0	1	-1	0	0
	27	-1	0	1	0	1	-1	1	0	1	1	1	-1	1	1	1	0	1	-1	1	0	0	0	1	0	0	0	0	-1	0	1	1	0	0	1	1	0	1	0	1	0
	28	0	0	-1	1	0	1	1	1	-1	0	na	-1	0	-1	1	-1	1	0	-1	0	-1	1	0	-1	-1	1	1	-1	0	-1	1	0	0	-1	0	0	-1	0	0	-1
	29	0	0	1	1	0	0	0	-1	-1	-1	-1	-1	1	1	1	1	-1	1	1	-1	0	1	0	-1	-1	-1	-1	-1	1	0	0	0	0	0	-1	0	1	1	0	0
	30	-1	-1	0	0	-1	1	1	-1	1	0	1	1	-1	-1	-1	-1	1	1	0	0	-1	-1	0	0	0	1	1	0	-1	-1	0	-1	1	1	1	0	0	-1	0	0
	31	0	0	0	-1	-1	-1	1	-1	-1	-1	0	-1	0	1	1	0	1	-1	-1	-1	-1	0	0	-1	0	-1	0	-1	1	0	1	-1	-1	1	0	-1	1	0	1	-1
	32	1	0	0	-1	-1	-1	-1	0	-1	-1	0	1	0	1	1	-1	1	-1	0	-1	-1	0	0	0	0	0	0	1	0	0	0	-1	-1	-1	1	-1	1	0	0	-1
	33	0	0	0	-1	-1	-1	-1	0	0	-1	1	-1	-1	-1	-1	0	1	0	0	0	-1	0	0	-1	-1	-1	1	-1	-1	-1	1	-1	0	0	0	-1	1	-1	0	-1
	34	1	0	0	-1	0	0	-1	-1	-1	-1	0	-1	1	0	1	-1	1	0	0	0	0	-1	-1	0	-1	1	-1	1	-1	-1	1	0	0	0	1	0	0	1	0	0
	35	0	-1	-1	1	-1	0	-1	-1	0	-1	0	-1	-1	-1	1	-1	1	1	0	-1	-1	-1	1	1	0	-1	0	1	-1	0	1	-1	-1	-1	-1	0	0	1	0	0
	36	0	0	0	-1	-1	0	1	-1	-1	-1	-1	-1	0	1	1	-1	1	-1	1	-1	-1	-1	1	-1	-1	-1	1	1	0	0	1	-1	-1	-1	0	0	0	-1	0	0
	37	0	0	-1	0	-1	1	0	0	-1	-1	-1	-1	1	1	1	1	0	-1	1	0	-1	1	0	-1	-1	-1	0	-1	1	1	1	1	-1	-1	-1	-1	1	1	1	1
	38	-1	-1	0	0	-1	1	0	0	0	-1	1	-1	0	0	1	-1	-1	1	1	-1	0	-1	0	-1	-1	-1	1	0	1	-1	0	0	-1	0	1	-1	0	1	1	-1
	39	0	-1	1	-1	1	-1	0	0	1	0	1	-1	0	-1	1	0	1	1	1	-1	1	1	0	-1	0	1	0	-1	-1	1	1	-1	0	-1	-1	-1	1	0	1	-1
	40	-1	1	1	0	0	0	1	-1	-1	0	0	-1	1	1	na	1	0	0	1	0	-1	0	1	-1	0	-1	0	-1	1	1	1	0	0	-1	0	-1	1	1	1	0
	41	-1	-1	-1	-1	0	0	-1	1	-1	0	0	-1	0	1	-1	0	0	0	0	-1	-1	-1	0	0	-1	-1	0	0	-1	-1	0	0	-1	0	0	-1	1	-1	0	-1
	42	0	0	0	0	0	0	0	0	-1	-1	-1	-1	1	1	1	1	0	1	1	-1	0	1	1	-1	-1	-1	-1	-1	1	1	1	1	0	-1	-1	0	1	1	1	0
	43	-1	0	0	0	0	0	0	0	-1	-1	-1	-1	1	1	1	1	0	-1	0	1	1	0	0	0	-1	-1	-1	-1	1	1	0	1	-1	-1	-1	-1	1	1	1	1
	44	0	0	0	-1	0	0	1	-1	0	0	1	-1	0	1	1	-1	1	1	-1	1	-1	0	0	-1	0	1	1	-1	1	1	0	-1	1	1	1	-1	1	1	0	-1
	45	0	0	0	-1	-1	-1	0	-1	0	-1	0	1	-1	0	-1	-1	1	0	-1	0	-1	0	0	0	1	0	0	0	0	-1	1	-1	-1	0	0	0	-1	0	-1	-1
	46	1	0	1	-1	0	0	0	0	0	0	1	-1	1	0	1	0	1	-1	0	0	0	0	1	0	0	0	0	-1	0	1	0	0	-1	-1	1	-1	0	0	1	0
	47	0	0	1	0	-1	0	0	0	-1	-1	-1	-1	1	1	1	1	1	1	0	1	0	0	-1	-1	-1	-1	0	-1	1	1	1	1	-1	-1	-1	-1	1	1	1	0
	48	1	1	1	1	1	0	1	1	1	1	1	1	1	1	1	-1	1	na	1	0	na	1	1	0	0	1	0	1	0	0	1	0	1	na	1	1	1	0	0	-1
	49	1	1	1	0	1	1	0	0	-1	-1	-1	-1	1	1	1	1	0	0	0	1	0	1	1	0	-1	-1	0	-1	1	1	1	1	0	-1	-1	-1	1	1	1	na
	50	0	1	0	1	0	1	0	0	-1	-1	-1	-1	1	1	1	0	1	0	1	-1	0	1	0	0	0	-1	0	1	0	1	1	0	0	-1	-1	-1	1	0	1	0
	51	0	0	1	0	1	1	0	-1	-1	1	1	na	0	0	1	0	0	1	-1	1	-1	0	0	-1	1	0	-1	-1	0	-1	-1	-1	1	0	0	0	0	-1	-1	1
	52	-1	0	1	-1	-1	0	1	-1	0	-1	0	-1	0	0	1	-1	1	-1	1	-1	-1	1	1	-1	0	-1	1	-1	1	1	0	-1	-1	1	1	-1	1	0	1	-1
	53	0	0	0	0	0	-1	-1	-1	-1	-1	-1	-1	1	1	-1	1	1	1	1	0	0	1	1	-1	-1	-1	0	-1	0	1	1	0	0	-1	0	0	1	1	1	1
	54	0	0	1	1	0	1	0	-1	0	0	-1	-1	1	0	-1	0	1	0	-1	0	-1	-1	1	-1	0	0	0	0	0	0	1	0	-1	-1	-1	-1	1	1	1	-1
	55	-1	0	1	-1	0	1	1	0	-1	-1	1	-1	0	0	1	0	-1	-1	0	-1	0	1	1	-1	-1	-1	1	-1	-1	0	1	-1	-1	1	1	-1	1	0	1	0
	56	0	-1	0	-1	1	1	1	0	0	0	-1	-1	1	0	1	0	0	0	0	-1	-1	0	1	0	1	-1	-1	0	0	-1	-1	0	-1	-1	-1	0	0	-1	1	-1
	57	0	0	-1	-1	0	-1	0	0	0	1	1	-1	1	0	-1	-1	-1	1	-1	0	-1	0	1	0	1	0	0	0	0	1	0	0	-1	-1	0	1	0	1	-1	-1
	58	1	0	-1	0	-1	0	-1	0	0	-1	-1	-1	0	1	-1	1	1	-1	0	-1	-1	-1	0	-1	0	1	1	1	-1	-1	0	-1	0	-1	-1	0	1	1	1	-1
	59	-1	1	1	-1	0	-1	-1	-1	-1	0	0	1	1	0	1	0	0	0	1	0	-1	-1	1	0	-1	0	0	0	0	0	1	-1	-1	-1	0	0	0	1	0	0
	60	0	0	-1	1	-1	0	-1	1	0	1	-1	1	1	1	-1	1	1	-1	0	0	1	1	-1	1	1	0	-1	1	0	1	-1	1	0	0	-1	1	1	0	-1	0
	61	0	0	0	-1	-1	0	0	0	-1	0	1	1	0	1	1	-1	0	1	1	-1	-1	-1	0	0	1	0	0	0	0	-1	1	-1	0	-1	1	-1	1	1	0	-1
	62	0	-1	0	0	0	1	0	-1	-1	-1	-1	1	1	0	-1	1	0	1	-1	-1	0	1	0	0	0	-1	0	0	1	-1	0	1	-1	0	0	1	1	1	0	0
	63	-1	1	0	0	0	1	-1	-1	0	-1	0	-1	0	0	1	0	1	na	-1	-1	-1	-1	0	0	0	0	1	0	0	-1	0	1	-1	0	0	-1	-1	0	0	-1
	64	0	-1	0	-1	0	0	1	-1	-1	-1	-1	-1	0	1	1	0	1	0	1	1	0	0	0	0	0	-1	1	-1	1	0	1	0	-1	-1	-1	-1	1	1	1	0
	65	1	0	0	-1	0	0	0	0	1	-1	0	1	0	0	-1	1	1	0	1	0	1	0	0	0	-1	-1	1	-1	1	0	1	0	-1	-1	-1	-1	0	0	-1	0
	66	0	-1	1	0	0	0	1	0	-1	-1	1	-1	0	-1	1	-1	1	-1	0	-1	-1	0	1	0	1	0	1	0	0	0	1	-1	0	-1	1	-1	-1	0	-1	-1
	67	0	-1	1	0	1	1	1	0	0	0	1	-1	0	-1	1	0	0	1	0	0	0	0	0	1	1	0	1	0	1	1	0	-1	0	0	-1	1	0	0	-1	-1
	68	1	-1	0	0	0	-1	0	0	-1	0	-1	-1	0	0	-1	1	-1	0	0	-1	0	-1	-1	-1	-1	-1	-1	-1	0	0	-1	0	-1	0	-1	0	1	0	0	-1
	69	0	0	0	1	1	0	1	-1	0	-1	-1	-1	0	1	1	0	0	0	1	0	0	0	1	-1	1	-1	-1	-1	1	1	1	1	0	-1	0	-1	1	1	1	1
	70	1	0	0	-1	1	0	-1	0	-1	-1	-1	-1	1	1	1	1	1	-1	1	0	0	0	0	0	-1	-1	-1	-1	1	1	-1	1	-1	-1	-1	-1	1	1	1	1
	71	-1	1	0	0	-1	1	-1	-1	1	-1	0	-1	-1	0	-1	1	-1	0	0	0	0	-1	0	0	0	0	-1	0	-1	-1	1	1	1	0	1	0	-1	1	0	-1
	72	1	0	-1	0	0	0	0	0	-1	-1	-1	1	1	0	1	1	0	-1	1	-1	0	0	1	-1	0	-1	0	-1	1	1	1	-1	-1	-1	-1	-1	0	0	1	0
	73	0	0	-1	-1	0	-1	1	-1	-1	0	0	1	1	-1	1	-1	-1	0	1	-1	-1	-1	0	-1	-1	0	-1	0	0	1	1	0	-1	0	0	0	0	0	0	-1
	74	0	-1	-1	-1	0	-1	1	-1	0	0	1	-1	-1	0	-1	-1	0	-1	-1	-1	0	0	0	0	0	0	0	1	1	0	1	-1	-1	0	-1	-1	0	1	-1	1
	75	0	0	-1	-1	1	-1	0	0	-1	-1	-1	-1	1	1	1	1	1	0	1	0	-1	1	1	-1	-1	-1	-1	-1	1	0	0	1	-1	0	0	-1	1	1	1	-1
	76	1	0	0	0	-1	-1	0	0	-1	-1	0	1	1	0	1	-1	1	-1	-1	1	-1	0	1	0	1	0	1	0	0	0	0	-1	1	1	0	0	1	0	1	0
	77	0	1	0	0	0	0	0	0	-1	-1	1	1	0	0	1	-1	0	0	1	1	0	1	0	0	0	1	1	0	1	0	-1	0	-1	-1	1	0	1	1	-1	0
	78	-1	-1	1	-1	-1	0	-1	0	-1	0	1	-1	0	-1	1	1	0	0	0	-1	0	0	1	0	0	1	0	1	1	-1	1	0	0	1	1	-1	0	1	0	-1
	79	0	0	0	0	-1	-1	0	0	0	0	1	-1	0	0	-1	0	1	-1	0	0	-1	0	0	-1	0	0	1	-1	0	0	1	0	-1	0	1	-1	1	1	0	0
	80	0	-1	1	0	-1	0	-1	0	-1	-1	-1	-1	1	1	1	1	1	0	1	-1	0	1	1	-1	-1	-1	0	-1	1	1	1	1	0	-1	-1	0	1	1	1	0
	81	1	-1	0	-1	0	0	0	-1	1	0	0	1	0	0	1	-1	1	0	-1	0	-1	-1	1	0	-1	0	0	0	0	0	1	-1	-1	1	1	-1	1	0	-1	1
	82	0	-1	0	0	-1	-1	-1	0	-1	-1	-1	-1	-1	1	1	1	-1	0	1	0	0	0	1	-1	-1	-1	-1	-1	1	1	1	1	-1	-1	-1	-1	1	0	1	0
	83	1	1	0	-1	1	0	0	0	-1	-1	-1	-1	1	1	1	1	0	1	1	0	-1	0	0	-1	-1	-1	0	-1	1	1	1	0	-1	-1	-1	-1	1	1	1	0
	84	1	1	1	0	-1	0	1	1	-1	-1	-1	-1	1	0	-1	0	0	1	0	0	-1	-1	1	-1	-1	-1	-1	1	1	0	-1	-1	-1	0	0	1	0	1	-1	0
	85	0	0	0	0	0	-1	1	0	-1	0	0	-1	0	0	1	0	1	0	0	0	0	0	0	-1	0	-1	1	-1	0	0	1	-1	0	-1	1	0	0	0	0	-1
	86	0	-1	0	-1	-1	0	-1	0	-1	-1	0	1	0	0	-1	0	0	0	0	0	0	-1	-1	0	0	0	-1	0	-1	-1	-1	-1	0	-1	0	0	-1	0	-1	0
	87	1	-1	1	-1	1	0	1	-1	0	0	0	-1	0	1	1	-1	1	-1	1	-1	0	1	1	-1	0	0	0	-1	1	1	1	-1	0	0	0	-1	1	1	1	0
	88	1	0	0	0	0	1	0	0	-1	0	0	-1	1	1	1	1	-1	0	1	-1	1	1	0	-1	1	0	1	0	0	1	1	0	-1	-1	0	-1	0	1	1	1
	89	0	-1	1	-1	0	0	0	0	1	0	1	-1	-1	0	1	0	0	0	0	1	-1	0	-1	-1	-1	1	1	-1	0	-1	1	-1	0	-1	1	-1	0	0	-1	1
	90	1	0	-1	0	-1	na	-1	0	-1	-1	1	-1	0	1	-1	0	-1	-1	na	0	-1	na	1	0	0	-1	1	0	1	-1	-1	0	-1	1	1	1	0	0	0	0
	91	-1	0	1	-1	0	-1	0	1	-1	-1	0	na	0	-1	-1	1	0	-1	1	-1	-1	1	0	0	0	0	1	-1	0	0	1	-1	-1	-1	0	0	0	0	1	0
	92	0	0	-1	-1	0	0	0	0	0	-1	-1	-1	1	1	1	1	0	-1	0	0	-1	-1	-1	0	-1	-1	0	-1	1	1	0	1	-1	-1	-1	0	0	0	1	0
	93	-1	0	0	1	-1	-1	0	0	-1	-1	-1	-1	1	1	1	1	0	0	1	1	-1	0	0	0	-1	-1	-1	-1	1	1	1	1	-1	-1	-1	-1	1	1	1	1
	94	-1	0	-1	-1	0	0	1	-1	0	0	1	-1	0	1	1	-1	0	1	1	-1	-1	0	1	-1	0	-1	1	-1	1	0	1	-1	-1	0	1	-1	0	-1	1	-1
	95	0	0	-1	-1	0	-1	1	0	-1	1	0	1	0	0	1	-1	0	-1	1	-1	0	0	1	-1	0	-1	1	0	-1	-1	1	-1	0	0	1	0	1	0	1	0
	96	1	1	1	0	1	1	0	0	0	-1	1	1	1	1	1	0	1	1	0	-1	-1	0	1	0	-1	0	0	-1	1	1	0	-1	0	0	1	1	0	1	1	-1
	97	-1	1	0	1	-1	-1	1	0	0	-1	-1	1	1	0	-1	0	1	0	-1	-1	-1	0	0	0	0	0	1	0	1	-1	0	0	0	0	1	-1	0	0	-1	0
	98	1	0	-1	-1	-1	-1	0	0	-1	0	0	-1	0	-1	-1	-1	0	-1	-1	-1	-1	0	0	-1	0	0	0	0	1	-1	0	0	0	-1	0	0	0	0	-1	0
	99	0	-1	0	-1	0	0	0	0	0	-1	1	-1	0	-1	1	0	1	0	0	-1	-1	1	0	-1	-1	0	1	1	1	0	1	-1	0	-1	1	-1	0	1	1	0
	100	-1	1	0	1	-1	0	0	-1	-1	-1	0	1	0	0	-1	-1	-1	0	0	-1	-1	-1	0	0	-1	1	1	1	1	0	1	1	0	0	1	0	1	0	0	0

## Sheet: Diagonal Routes
		FLAT				MTN				Emtn/Wflat				Wmtn/Eflat				Nmtn/Sflat				Smtn/Nflat				NEmtn/SWflat				NWmtn/SEflat				SEmtn/NWflat				SWmtn/NEflat
a -1 is south (SW or SE) select		BothStraight	BothWindy	Nstraight/Swindy	Sstraight/Nwindy	BothStraight	BothWindy	Nstraight/Swindy	Sstraight/Nwindy	BothStraight	BothWindy	Nstraight/Swindy	Sstraight/Nwindy	BothStraight	BothWindy	Nstraight/Swindy	Sstraight/Nwindy	BothStraight	BothWindy	Nstraight/Swindy	Sstraight/Nwindy	BothStraight	BothWindy	Nstraight/Swindy	Sstraight/Nwindy	BothStraight	BothWindy	Nstraight/Swindy	Sstraight/Nwindy	BothStraight	BothWindy	Nstraight/Swindy	Sstraight/Nwindy	BothStraight	BothWindy	Nstraight/Swindy	Sstraight/Nwindy	BothStraight	BothWindy	Nstraight/Swindy	Sstraight/Nwindy
a 1 is north (NW or NE) select		flat_ne-sw_ss	flat_ne-sw_ww	flat_ne-sw_sw	flat_ne-sw_ws	mtn_ne-sw_ss	mtn_ne-sw_ww	mtn_ne-sw_sw	mtn_sw-ne_ws	emwf_ne-sw_ss	emwf_ne-sw_ww	emwf_ne-sw_sw	emwf_ne-sw_ws	wmef_ne-sw_ss	wmef_ne-sw_ww	wmef_ne-sw_sw	wmef_ne-sw_ws	nmsf_ne-sw_ss	nmsf_ne-sw_ww	nmsf_ne-sw_sw	nmsf_ne-sw_ws	smnf_ne-sw_ss	smnf_ne-sw_ww	smnf_ne-sw_sw	smnf_ne-sw_ws	nemswf_ne-sw_ss	nemswf_ne-sw_ww	nemswf_ne-sw_sw	nemswf_ne-sw_ws	nwmsef_ne-sw_ss	nwmsef_ne-sw_ww	nwmsef_ne-sw_sw	nwmsef_ne-sw_ws	semnwf_ne-sw_ss	semnwf_ne-sw_ww	semnwf_ne-sw_sw	semnwf_ne-sw_ws	swmnef_ne-sw_ss	swmnef_ne-sw_ww	swmnef_ne-sw_sw	swmnef_ne-sw_ws
		flat_nw-se_ss	flat_nw-se_ww	flat_nw-se_sw	flat_nw-se_ws	mtn_nw-se-ss	mtn_nw-se-ww	mtn_nw-se_ws	mtn_nw-se_sw	emwf_nw-se_ss	emwf_nw-se_ww	emwf_nw-se_ws	emwf_nw-se_sw	wmef_nw-se_ss	wmef_nw-se_ww	wmef_nw-se_ws	wmef_nw-se_sw	nmsf_nw-se_ss	nmsf_nw-se_ww	nmsf_nw-se_ws	nmsf_nw-se_sw	smnf_nw-se_ss	smnf_nw-se_ww	smnf_nw-se_ws	smnf_nw-se_sw	nemswf_nw-se_ss	nemswf_nw-se_ww	nemswf_nw-se_ws	nemswf_nw-se_sw	nwmsef_nw-se_ss	nwmsef_nw-se_ww	nwmsef_nw-se_ws	nwmsef_nw-se_sw	semnwf_nw-se_ss	semnwf_nw-se_ww	semnwf_nw-se_ws	semnwf_nw-se_sw	swmnef_nw-se_ss	swmnef_nw-se_ww	swmnef_nw-se_ws	swmnef_nw-se_sw
		flat_se-nw_ss	flat_se-ne_ww	flat_se-nw_ws	flat_se-nw_sw	mtn_se-nw_ss	mtn_se-nw_ww	mtn_se-nw_sw	mtn_se-nw_ws	emwf_se-nw_ss	emwf_se-nw_ww	emwf_se-nw_sw	emwf_se-nw_ws	wmef_se-nw_ss	wmef_se-nw_ww	wmef_se-nw_sw	wmef_se-nw_ws	nmsf_se-nw_ss	nmsf_se-nw_ww	nmsf_se-nw_sw	nmsf_se-nw_ws	smnf_se-nw_ss	smnf_se-nw_ww	smnf_se-nw_sw	smnf_se-nw_ws	nemswf_se-nw_ss	nemswf_se-nw_ww	nemswf_se-nw_sw	nemswf_se-nw_ws	nwmsef_se-nw_ss	nwmsef_se-nw_ww	nwmsef_se-nw_sw	nwmsef_se-nw_ws	semnwf_se-nw_ss	semnwf_se-nw_ww	semnwf_se-nw_sw	semnwf_se-nw_ws	swmnef_se-nw_ss	swmnef_se-nw_ww	swmnef_se-nw_sw	swmnef_se-nw_ws
		flat_sw-ne_ss	flat_sw-ne_ww	flat_sw-ne_ws	flat_sw-ne_sw	mtn_sw-ne_ss	mtn_sw-ne_ww	mtn_ne-sw_ws	mtn_sw-ne_sw	emwf_sw-ne_ss	emwf_sw-ne_ww	emwf_sw-ne_ws	emwf_sw-ne_sw	wmef_sw-ne_ss	wmef_sw-ne_ww	wmef_sw-ne_ws	wmef_sw-ne_sw	nmsf_sw-ne_ss	nmsf_sw-ne_ww	nmsf_sw-ne_ws	nmsf_sw-ne_sw	smnf_sw-ne_ss	smnf_sw-ne_ww	smnf_sw-ne_ws	smnf_sw-ne_sw	nemswf_sw-ne_ss	nemswf_sw-ne_ww	nemswf_sw-ne_ws	nemswf_sw-ne_sw	nwmsef_sw-ne_ss	nwmsef_sw-ne_ww	nwmsef_sw-ne_ws	nwmsef_sw-ne_sw	semnwf_sw-ne_ss	semnwf_sw-ne_ww	semnwf_sw-ne_ws	semnwf_sw-ne_sw	swmnef_sw-ne_ss	swmnef_sw-ne_ww	swmnef_sw-ne_ws	swmnef_sw-ne_sw
	1	0	-0.333333	0	0.5	-0.333333	0.333333	0	0	0	1	0	-0.5	0	0	0	0	-1	-0.5	-0.5	0.333333	0.333333	0.5	0	0.5	-0.5	-0.5	0	-0.5	-0.5	0	-0.5	-1	0.333333	0	0	1	0	-0.333333	0.5	1
	2	1	0.333333	1	-1	-0.333333	1	1	-0.5	-1	-0.5	0.5	-1	0	0	0.5	-1	-0.5	0	0.5	-1	0.5	0	1	-1	0.5	-0.5	1	-1	-1	0.5	1	-1	-0.5	-0.5	1	0.5	-1	0	1	-1
	3	-1	-1	1	-1	0	-1	0.5	-0.5	0	-0.5	1	-1	-0.5	-0.5	1	-0.333333	-0.333333	-1	1	-1	0	-1	1	-1	1	-1	0.5	-0.5	0	-0.333333	1	-1	0	0.333333	0	-1	0	-0.5	0.5	-1
	4	0.5	-0.333333	1	-0.5	-1	0	0.5	0	0	0	0.5	0	0.5	1	1	-0.5	-0.5	-1	-0.5	-1	0	1	0	0	-0.5	-1	-0.5	-0.5	-0.5	-0.5	0	-0.333333	0.5	0	0.5	0	1	0.5	0	0
	5	0	-0.333333	0	-1	0.333333	0	-1	0	0	-0.333333	0	1	0	-1	-0.5	0.333333	0.333333	-0.5	-0.5	0.5	-1	0.5	0	-0.5	-0.5	0.333333	-0.333333	0	-0.333333	0.5	0	0.5	1	-1	0.5	-1	0.5	-0.5	0.5	0
	6	-0.5	-0.333333	1	-1	0.333333	0.333333	0.5	-1	0	0.5	1	0	-0.5	-0.5	0.5	0	0.5	0.5	1	-0.5	0	0	0	-1	1	1	1	0	-0.5	-1	0.5	0	0.5	0	0.5	-1	0	0.5	-1	-1
	7	0	-1	0	-1	0.333333	-0.333333	0	-0.5	0	-0.5	1	0	0	1	0.5	0	0	0	0	-1	0.5	0.5	0	0	0	-0.5	0	-0.5	-0.5	-0.5	0	0	0.5	0.5	1	0	0	0	1	0
	8	-0.333333	-1	0.5	-1	-0.333333	0.333333	-0.333333	-0.5	1	-0.5	0.5	-1	-0.5	0	-0.333333	-0.5	-0.5	-0.5	-0.333333	1	-0.333333	0.333333	0	-0.5	-1	-0.333333	0	-0.5	-0.333333	1	0	-1	-0.5	-1	0.5	-1	0.333333	-0.5	1	-1
	9	0	-1	0.5	-1	-0.333333	-0.333333	1	0	0	-0.5	0.5	-1	0.5	0	0	-1	0	-0.5	0.5	0	-0.5	0.5	-0.5	-0.5	-1	-0.5	0.5	-1	-1	0.5	0.5	-0.5	0.5	0	1	-0.5	0	0	1	-0.5
	10	-0.5	0.333333	0.5	-0.5	-0.333333	-0.333333	0	0	0	0	0	0.5	0	-1	1	-0.5	-0.333333	0.5	0	0.333333	0	0.5	-1	-0.5	0.5	0	-1	0	-0.5	0.5	0.5	-0.5	0.5	-1	0.5	0.5	0.5	-0.5	0	-0.5
	11	0	0.333333	0.5	-1	-0.333333	-0.333333	0.5	0	-0.5	0	0	-1	-0.5	1	1	-1	0	0	0.5	0	0	0.5	0.5	-1	-1	0	0	-0.5	-0.5	0.5	0	-1	0.5	-1	0.5	-0.5	-0.5	-1	1	-0.5
	12	0	-0.333333	0	0	-0.333333	-0.333333	0	0	0.5	0	0.5	0	-0.5	0	0	-0.5	-0.5	0	-1	-0.5	0	0	0	0.5	-1	-0.5	0	-0.5	0	-0.5	-0.5	-0.5	0	0	0	0.5	0	0	0	1
	13	0	1	1	-1	0	-1	1	-1	0	0.333333	1		0	1	1	-0.333333	0.333333	-0.5	1	-1	0	0	0	-1	0	0.5	1	-1	0	-0.5	1	-1	0.5	-0.5	0.333333	-1	1	0	1	-0.333333
	14	-0.333333	0.333333	0	-1	0.333333	0	-0.5	0	0	0.5	1	-0.5	-0.333333	0.5	0	0.5	0	-1	0.5	-0.333333	0.333333	0.333333	0.5	-0.333333	0.333333	-0.333333	-0.333333	-0.5	-1	0.333333	0	0	1	-1	0.5	0	1	-1	0.5	-0.5
	15	0	-0.333333	0.5	-0.5	-0.333333	0.333333	-0.5	-0.5	0	-0.5	0.5	0	0.5	0	0.5	-0.5	-0.5	-0.5	0.5	-1	0	0.5	-0.5	-0.5	-0.5	-1	0.5	-1	-1	0	0	-1	1	0	1	-0.5	0.5	0	0.5	-0.5
	16	0	-0.333333	1	-1	-0.333333	-0.333333	-0.5	0	-0.5	-0.5	0.5	-0.5	0	1	0.5	-0.5	-1	-1	-0.5	-0.5	0.5	0.5	0	0	-1	-0.5	-0.5	-1	0	0	-0.5	-0.5	0.5	0.5	1	0.5	0.5	0	0.5	0
	17	-0.5	-0.333333	0.5	-0.5	-0.333333	0.333333	0	0	0	-0.5	0.5	-1	0	0	0	-0.5	-0.5	-0.5	-0.5	-0.5	0	0	0.5	-0.5	-1	-1	-1	-1	-0.5	1	0.5	-1	-0.5	-0.5	1	0	0.5	0	1	0
	18	0	0.333333	-0.5	0	-0.333333	0.333333	-0.5	1	0	-0.5	0	1	0.5	-1	-0.5	-0.5	-0.5	0.5	-0.5	1	0.5	0	-1	0	0.5	0	-0.5	0.5	-0.5	0.5	-0.5	0.5	0.5	-0.5	-0.5	0.5	0	0	1	0
	19	-0.5	1	0.5	-1	-0.333333	-0.333333	0.5	-1	0	0	0	0	-0.5	0.5	-0.333333	-0.5	0	0	0	0.5	0	0	0	0.333333	0	0	0.333333	0.5	0	0	0.5	0	0.333333	-0.5	0	0.5	-0.5	0.5	0	0
	20	1	-0.333333	0	0	1	0.333333	0	0	0.5	-0.5	0.5	-0.5	0.5	-0.5	0	-0.5	0	-0.5	-0.5	0.5	0	0.5	-0.5	-0.5	0	-0.5	0.5	-0.5	0	1	0.5	0.5	0.5	0	0	0.5	0	0	0.5	0.5
	21	-0.5	-0.333333	0.5	-1	-1	1	0.5	-1	-1	-0.5	0.5	-0.5	-0.5	0	0.5	-0.5	0	0	0.5	1	0	0.5	-0.5	-0.5	-0.5	0.5	0	-1	-0.5	1	1	-0.5	1	-0.5	1	-1	0.5	0	1	-1
	22	0.5	0.333333	1	-1	-0.333333	0.333333	1	-1	-1	0	1	0.5	-0.5	-1	0.5	-0.333333	0	0.5	1	0	0	0.5	0.5	-0.5	0.5	0	0.5	-1	0.5	1	1	-1	1	-0.5	1	0	0	0	1	-1
	23	0	0.333333	0.5	-0.5	0.333333	0.333333	0.5	0.5	-0.5	0.5	0	-1	0.5	-0.5	1	-0.5	0.5	-0.5	0.5	0	0	0	0.5	-1	-0.5	0	0.5	-0.5	-0.5	1	0	-1	0.5	-0.5	0.5	-1	0.5	0	1	-0.5
	24	-0.333333	0.333333	0.333333	-0.333333	1	-1	0.333333	-1	-0.333333	1	-0.5	-0.333333	-0.5	0	0.5	0.333333	1	0.5	-0.333333	0	-1	0.333333	-0.5	-1	0	0	-1	-1	-0.5	0	1	0	-1	-1	-0.333333	-1	0.5	-1	-0.333333	-1
	25	-1	0	0	0	-0.333333	0.333333	-0.5	0	-0.5	-1	-1	-0.5	0	-1	-0.5	-0.5	-1	0	0	0	-0.5	0	-0.5	-0.5	-0.5	-1	-1	-1	-1	0.5	-1	-0.5	0	-1	0	-1	-1	-0.5	0.5	-0.5
	26	0	0.333333	1	-0.5	-0.333333	-0.333333	-1	0.5	0	0.5	0.5	0.5	0.5	0.5	1	0.5	1	0.5	0.5	0	0.5	0.5	0	0	0.5	0.5	0.5	0.5	0	0	1	-0.5	0.5	0	0.5	0.5	0	0.5	0.5	-1
	27	0.5	0.333333	0	-0.5	-0.333333	-0.333333	-0.333333	-0.5	-0.5	-1	1	0	0	0	-0.333333	-0.333333	0	-0.5	0	0	0.5	1	0	0.5	-1	-1	0	-0.5	-1	0	-1	-1	-1	0.5	0.5	0.5	0.5	-0.5	0	0.5
	28	0	0.333333	1	0	0.333333	1	0	0.5	-0.5	0.5	0.333333	0.5	0	-0.5	1	-0.333333	-1	0	0.5	0.5	0	1	0	-0.5	0.5	-0.5	0.5	0	0	0.5	0.5	1	0.333333	0.5	0.333333	-1	-1	-0.333333	0.5	-0.5
	29	0	-0.333333	-0.5	0	-0.333333	0.333333	0	0	0.5	-0.5	0	0	-0.5	-0.5	-0.333333	0.5	-0.5	-0.5	-0.5	-1	0	0.5	0	0.5	-1	-0.5	-1	-1	-0.5	-0.5	-0.5	0	0	0.5	0	1	0.5	0.5	-1	-0.5
	30	-0.5	-1	-0.5	-0.5	1	-0.333333	-0.5	-0.5	0	0.5	0	0	0	0	-0.5	-0.5	1	-0.5	0.5	1	-1	-1	-0.5	-1	1	0.5	0	0	0	0.5	0	1	-1	-1	0	-0.5	0	-0.5	-0.5	-0.5
	31	-0.5	0	1	-1	-0.333333	0.333333	0.5	0	0.5	0	0.5	-1	0	0	1	-0.5	0	-0.5	1	-0.5	0.5	0	1	0.5	-1	0	0.5	-0.5	-0.5	0.5	0.5	-1	0	0.5	1	0	0.5	0.5	1	0
	32	0	0.333333	0.5	0	-0.333333	1	0.5	0	0	0	0.5	0.5	0.5	0	0.5	-1	0	0.5	-1	0.5	0	0	0	-0.5	0	0	0.333333	0	0	0	0	0	1	-1	0.5	0	0.5	1	0.5	-1
	33	-0.5	-0.333333	1	-0.5	0.333333	0.333333	0	-0.5	-0.5	0.5	1	0	0	-0.5	1	-0.5	-0.5	0	0.5	-0.5	0.5	1	1	-1	-0.5	1	0	-1	0	0.5	0.5	-0.5	0	-0.5	1	-0.5	-0.5	-0.5	1	-0.5
	34	0	1	1	-0.5	0.333333	0.333333	-0.5	0.5	-0.5	0	-0.5	0.5	1	-0.5	-0.5	0.5	1	0	0	0	-0.5	0.5	-1	-1	-0.5	0.5	0	0	0	0.5	0.5	0.5	0	-0.5	-0.5	0	0	0.5	1	-0.5
	35	-0.333333	1	-0.333333	-1	1	-0.333333	0	0.333333	-0.333333	-0.5	1	0	0.5	-0.333333	0	0	0	1	-0.333333	0.333333	-0.333333	-1	-0.5	0.5	-0.5	-1	1	-0.5	-0.5	0.5	0	0	0.5	0.333333	0	-0.5	1	0.5	1	0.5
	36	0	1	1	-0.5	-0.333333	0.333333	0.5	-0.5	0	1	0.5	-1	0.5	0	0	0	-0.5	1	0.5	-1	0	0.5	0.333333	-0.5	-1	0	0.5	-1	-1	0.5	1	0	0.5	0	0.5	0.5	0.5	0	1	-0.5
	37	0	-0.333333	0	0	-1	-0.333333	0.5	0	0	0	-0.5	0	0	0	-0.5	0	-1	-0.5	-1	-0.5	0	0.5	-0.5	0.5	-0.5	0	0	0	-0.5	-0.5	-0.5	-0.5	0.5	0	0.5	0.5	1	0.5	0	0.5
	38	-1	-0.333333	1	-0.5	1	-0.333333	-0.5	-0.5	-1	-0.5	0.5	-1	-0.5	1	0	-1	-0.5	0	0	0	-1	1	1	-0.5	0.5	1	0	-1	-1	-1	0.5	0	0	-0.5	0.5	-0.5	0	0.333333	-0.5	-0.5
	39	0	0.333333	-0.333333	-0.5	0	-1	0.333333	0	0.333333	-0.5	0.333333	-1	-1	0	1	0.333333	-1	-0.5	-1	-1	0	0.333333	1	-1	1	0	1	-1	-0.5	-1	1	-1	1	1	0.333333	-0.5	-0.333333	0	1	0.333333
	40	0.333333	-0.333333	1	-0.5	-0.333333	0.333333	0.5	0	0	-0.5	0	0	0	0	0.5	0	-1	-0.5	-0.5	-0.5	0.5	1	0.5	0.5	-0.5	-0.5	-0.5	-0.5	-0.5	0	0.333333	-1	0	0	0.5	0	0	0.5	0.5	0
	41	-0.5	-0.333333	0.5	0	1	0.333333	0	1	0.5	0	0	-0.5	-0.5	0.5	0.5	0	0	0.5	-0.333333	0.5	-0.5	0.5	0	0	1	0.5	0	0.333333	0.5	-1	0	0.5	0	-0.5	0.5	0.5	0.5	-0.5	0	0
	42	0	-0.333333	-0.5	0.5	0.333333	-1	-0.5	0	0	0	0	0	0	0.5	0	0	-0.5	0	0	0.5	1	1	-1	1	0	-0.5	-1	-0.5	-0.5	0.5	-0.5	-0.5	0.5	0	0	0.5	0.5	0.5	0	1
	43	0.5	-0.333333	-1	0.5	1	1	0.5	0.5	0	0	-0.5	0	0	0.5	0.5	0	-0.5	-0.5	-0.5	0	1	1	0	1	0	0	-1	-0.5	0	0	-1	-0.5	0.5	0	0	0	0.5	0.5	0.5	1
	44	-1	-0.333333	0.5	-0.5	-0.333333	-0.333333	0.5	0	-0.5	0	0.5	-0.5	-1	0	0.5	-0.5	-1	0	0.5	0	-0.5	1	-0.5	-1	-0.5	-0.5	0.5	-1	-1	0	0.5	0	1	-0.5	0.5	-0.5	1	-0.5	1	-0.5
	45	0	-1	0	-1	1	0.333333	0.5	0.5	0	0	1	0.5	0.5	-0.5	0	-0.5	0.5	0.5	1	1	-0.5	0.5	-1	0	0	-0.5	0	0	0	0	0	0.5	-1	-0.5	0.5	0.5	-1	0.5	0.5	-0.5
	46	-0.5	0.333333	1	-1	0.333333	-0.333333	0.5	0	0.5	0.5	0.5	0.5	-0.5	-0.5	0	-1	-0.5	0.5	0.5	0	0	0	1	-0.5	0	0	0	-0.5	0.5	1	-0.5	-1	-1	1	0.5	0	0	0	0	-0.5
	47	0	-0.333333	0.5	0	-0.333333	-0.333333	-0.5	0.5	0	-0.5	-0.5	-0.5	0	0	0.5	0.333333	-1	-0.5	-1	0.5	0.5	0.5	-0.5	1	-0.5	-0.5	-0.5	-1	-0.5	0	0	-1	1	0	1	0.5	0.5	0	0	1
	48		-0.333333	-1	0	0.333333	0	-0.333333	1	1	-0.333333	-1	0.333333	1	-0.333333	-0.5	-0.333333	1	1	-0.333333	-0.5	-1	0	-0.333333	-0.333333	-0.5	-0.333333	1	-1	-0.333333	0	0	0	0	-1	-0.333333	-0.333333	1	-0.5	0	-0.333333
	49	0	-0.333333	0	-0.5	-1	-0.333333	0.333333	-0.5	-1	-1	-0.333333	0.333333	0	-1	0	-0.333333	-1	-0.5	-1	0	0.5	-0.5	-0.5	0.5	-0.5	-0.5	0	-1	-0.5	-0.333333	0.5	-0.5	0	0.5	1	0.5	1	0	0	0
	50	0	-0.333333	-0.5	0.5	-0.333333	1	-1	-0.5	-0.5	0	1	-0.5	0	0.5	0.5	0.5	0	0	-0.5	-0.5	0.5	0.5	0	1	-0.5	-0.5	-0.5	0	-0.5	0	0	0	1	0	1	0	0.5	0.5	0.5	1
	51	-0.5	-0.333333	0.5	-0.5	0.333333	-0.333333	-1	0.5	-0.333333	-0.5	0	0	0.5	0.5	0	0.5	0.5	0.5	0	0.5	0	-0.5	-1	0.5	1	0	-0.5	-0.333333	0.5	0.5	0.5	0	-0.5	-1	0	0	0	0.5	0.5	-0.5
	52	0	0.333333	1	-1	-0.333333	0.333333	1	-1	-0.5	0	0.5	-1	0	-1	1	-1	0	-0.5	0.5	-1	0	-1	0.5	-0.5	-0.5	0	0.5	-0.5	-0.5	-0.5	1	-1	1	-0.5	1	-1	0	0	1	-1
	53	0	-0.333333	0.5	-0.5	0.333333	-0.333333	-0.5	0	0	-0.5	0	-1	0.5	0.5	-0.5	0	-0.5	-1	0.5	-0.5	0	0.5	-0.5	0	-1	-1	0	-1	0	0	-1	0	0.5	-1	1	0.5	0	0	1	0
	54	-0.5	-0.333333	0	-0.5	-0.333333	-0.333333	0	0	0	0	0	-1	0	-0.5	0	0	-0.5	0	0	0.5	0	0	0	-1	-1	-0.5	-0.5	-0.5	-0.5	0.5	0.5	0	1	-0.5	0	0	0	-0.5	-0.5	0
	55	0	0	0.5	-0.5	1	0.333333	-1	1	0	0.5	0.333333	1	-0.333333	-0.5	0.5	0.333333	-1	0	0.5	1	0.5	0	1	0	0	-0.5	-0.5	-0.5	-0.5	0.333333	-1	0	1	-1	0.333333	-0.5	0.5	1	0.5	-0.333333
	56	-0.5	-0.333333	0	-1	-0.333333	-0.333333	0	1	1	-0.5	0	-0.5	0	0	0	-0.5	-0.5	-0.5	0.5	-0.5	-1	0	-0.5	-0.5	0.5	0	0	0	0.5	0	-0.5	-0.5	0.5	-0.5	0	0.5	-0.5	-0.5	0	-0.5
	57	-0.5	-0.333333	0	-0.5	-0.333333	0.333333	0	0	0	0	0.5	0	0.5	0.333333	-1	0	0	-0.333333	0	0	-0.333333	0.5	-0.5	0	0.333333	0	0.5	-0.5	0.333333	0.5	0.5	0	1	0.5	0.5	-1	0.5	0	0.5	-0.5
	58	0.333333	-0.333333	0	0	0.333333	1	0	1	0.5	1	0	0	1	-0.5	-1	0	1	0.5	0	0.5	0	0.5	-1	0.5	0.5	0.5	0	0.5	0	0.5	0	0	0.5	-0.5	-0.5	1	0.5	0.5	0.5	1
	59	0.5	-1	0	-1	-1	0.333333	-0.5	0.5	-0.5	0	1	0.5	0	0.5	0	0	0	-1	0.5	0	0.5	0	0	-0.5	0	0	0.5	-1	0.5	-0.5	0	-1	0.5	0.5	0.5	0	0.5	0	0.5	0
	60	0.5	0.333333	-1	0.5	-0.333333	-0.333333	-0.5	1	0	0.5	0	1	0	0	0	0.5	0	-1	-0.5	1	0	-0.5	-1	0.5	0.5	-0.5	-0.5	1	-1	0	-1	1	-0.5	0	-1	1	0	-0.5	-1	-0.5
	61	0.5	-0.333333	0.5	-0.5	0.333333	-0.333333	1	-0.5	-0.5	0.5	0.5	-0.5	0	0	1	0	0	0.5	0.5	0	0	0	0	-1	-0.5	-0.5	1	-0.5	-0.5	0.5	0.5	0.5	0.5	0	0	-0.5	-0.5	-0.5	0.5	0.5
	62	-0.5	0.333333	0	-1	-0.333333	-0.333333	0	-0.5	0.5	-0.5	0.5	0	-0.5	-0.5	0.5	-1	-1	0	0.5	0	-0.5	-0.5	-0.5	0.5	1	-0.5	-0.5	0	-1	0	1	0	0.5	0.5	-0.333333	1	-0.5	0.5	-0.5	0.333333
	63	-0.5	0.333333	1	-0.333333	-0.333333	0	0.5	-0.5	-0.5	-0.333333	0	0.333333	0	0	0.5	-0.5	-0.5	0	0	-0.333333	0.333333	-0.5	0	0.5	-0.5	1	0.5	-0.5	-0.5	0.5	0.5	1	0	-1	1	0	0	0	1	-0.5
	64	0	-0.333333	0	0.5	-0.333333	1	0.5	0	0	0	-0.5	0.5	0.5	0.5	0.5	1	-0.5	-1	0	0	1	1	0	0.5	0	0	0	-0.5	0	0	0.5	-0.5	0.5	-0.5	0	-0.5	0.5	0.5	0.5	0.5
	65	-1	0.333333	0	-0.5	1	0.333333	0.5	0	0	0	0.5	-0.5	-0.5	0	0.5	-0.5	-0.333333	0	0	-0.5	0.5	0	0.5	-1	0.5	-0.5	0	-0.5	-0.5	1	-0.5	-0.5	0.5	0	-0.5	0	0.5	-0.5	-0.5	-0.5
	66	-0.333333	-0.333333	0	0	-0.333333	-0.333333	0.5	-1	-0.5	0.5	0	0	-0.333333	0	1	-0.5	0.5	-0.333333	0	0	-0.5	-0.5	0.5	-0.5	-0.5	0.5	0	-0.5	-0.5	0.5	1	-1	0.333333	-1	1	-0.5	0	-0.5	0	-1
	67	0.5	-0.333333	0.5	-0.5	1	-1	-0.5	-0.5	0	0.5	0.5	0.5	0	-0.5	0	-0.5	0	0	0	-0.5	-1	1	-0.5	-1	0	-1	-0.5	-0.5	0	0.5	-1	0.5	-0.5	0	0	-0.5	-0.5	0	0.333333	-0.5
	68	-0.333333	-0.333333	0	-0.5	1	-0.333333	0.5	0	0.5	0.5	0.5	0.5	-0.5	0.5	0.5	0	0	0.5	0	0	0.5	0	-0.5	0	0.5	0	0	-0.5	0	0	0.5	0.5	-0.5	-0.5	-0.5	0	0.5	0	0.5	0.333333
	69	0	0.333333	1	-1	1	0.333333	0	0.5	0	0	0	0	0	0	0	0	-1	0.5	-1	-1	1	0	0.5	0.5	0	0	-1	-1	0	0.5	-0.5	-0.5	0	0.5	0.5	-0.5	0	0	0	0.5
	70	-1	0.333333	-0.5	0	0.333333	-0.333333	0.5	-0.5	0.5	0	0.5	-0.5	0	0.5	0	0	-1	0	-0.5	0.5	1	0.5	0	0.5	-0.5	-0.5	-0.5	-0.5	-0.5	0	-0.5	-1	0	0.5	1	0	0	0	0	0
	71	-0.5	0.333333	0.5	-1	0.333333	-0.333333	0	0	1	0	0.5	-0.5	0	1	0.5	0.5	0	0.333333	0.5	-0.5	-0.5	-0.5	1	0.5	0	0.333333	0.5	1	1	0.5	0.5	-1	-0.5	0	-0.5	0.5	-0.5	-0.5	-0.5	-0.5
	72	0.5	-1	0.5	-0.5	-1	-0.333333	-0.5	0	0	-0.5	0	-0.5	0.5	0	-0.5	0	-1	-1	0	-0.5	0	0.5	-1	0	-0.5	0	-0.5	-1	-1	0	-1	-0.5	1	-0.5	0	0	0	-0.5	1	0
	73	-0.5	-0.333333	1	-1	-0.333333	-1	-0.5	-0.5	0.5	0	1	0	0	0.5	-1	-0.5	0	0	0.5	-0.5	-0.5	0.5	0	0	0.5	0	1	-0.5	0.5	0	0	0	-1	-0.5	0.5	-1	1	-1	-0.5	-1
	74	-0.5	-1	0.5	-0.5	-0.333333	1	1	-0.5	0.5	0.5	1	0.5	0	-0.5	0	-1	0	-0.5	0.5	0	-0.5	0.5	0.5	-0.5	-0.5	0.5	0.5	-0.5	0	0	1	-1	0	-0.5	0.5	-1	1	0.5	1	-1
	75	0	-0.333333	0.5	-0.5	-0.333333	-0.333333	-1	0	0	0	0.5	-1	0	0	0.5	-0.5	-0.5	-0.5	0	-0.5	0	0	0.5	-0.5	0	-0.5	-0.5	-1	0	0.5	-0.5	0	0.5	0	1	1	0.5	0	1	0
	76	-0.5	-0.333333	-0.5	-0.5	-0.333333	-0.333333	-0.5	0	0.5	0.333333	1	0.5	0.333333	0	0.5	0.5	0	0	1	0.5	-0.5	1	0.5	0	0.5	0	0	0.5	0	1	0	0	0.5	0	-1	0.5	0.5	0	0	0.5
	77	0	0.333333	0.5	1	1	0.333333	-0.5	1	0.5	-1	0	0.5	1	-0.5	0	0	-0.5	0.5	0.5	0	0	0	0	-0.5	-0.5	0.5	-0.5	-0.5	-0.5	0	-0.5	0	1	0	0	-0.5	-0.5	0.5	0	0
	78	0.5	1	1	-1	1	0.333333	1	0	0	-0.5	1	0	0	0.5	0.5	0	-0.5	0	0	0.5	0.5	0	-0.5	0	0.5	0.5	1	-0.5	0	0.5	-0.5	0	0.5	-0.5	1	1	0	0	1	-0.5
	79	0	-0.333333	0.5	-1	-0.333333	-0.333333	0	0	0.5	-1	0.5	-1	0.5	0	-0.5	-0.5	-0.5	0	0.5	0	0	0	0	-0.5	-0.5	0	-1	-1	0	0	0	-1	0	-1	0	0	0	0	0	0.5
	80	0	-1	0.5	-0.5	0.333333	-1	0.5	0	0	0	0	0	0.5	0	0.5	0	-0.5	-1	0.5	0	1	1	0.5	0	-1	-0.5	0	-0.5	-0.5	0.333333	-0.5	0	0.5	0	0	0.5	0	0	0	0
	81	-0.5	-0.333333	-1	-1	-0.333333	-1	-1	-0.5	0	-0.5	0.5	-1	0.5	-1	-1	-0.5	-0.5	-0.5	0.5	0	0	-0.5	0	-1	-0.333333	-0.5	-1	-1	-1	-0.5	0.333333	-0.5	0	-1	-0.5	0	-0.5	-0.5	-1	-1
	82	0	0.333333	1	-1	0.333333	-0.333333	1	-1	0.5	0	0	0	-0.5	0.5	0	-0.5	-0.5	-0.5	0	-0.5	0	-0.5	0.5	0	0	-0.5	-1	0	-0.5	-1	-0.5	-0.5	0	0	0.5	-1	-0.5	0	0.5	0
	83	0	-0.333333	0.5	-0.5	0.333333	-0.333333	0	0.5	0	-0.5	0.5	0	-0.5	0	0	0.5	-1	-1	0	-0.5	1	1	0	1	0	-0.5	-1	-0.5	0	0	-0.5	-1	0	-0.5	0.5	0	0.5	0	0	0
	84	0.5	0	0	-0.5	-0.333333	-1	-0.333333	-0.333333	0.5	-0.333333	0.5	-0.333333	0.333333	0	-1	0.333333	0.5	0	0.5	0.5	0	1	-0.5	-0.5	-1	1	-1	0	-0.333333	0.5	-1	-0.5	1	-0.333333	1	1	0	0	-1	-0.5
	85	0	0.333333	1	-0.5	-1	-0.333333	0.5	-0.5	-0.5	-1	1	-0.5	0	0	1	0	0	-0.5	0.5	0.5	0.5	0.5	0	-0.5	0	0	-0.5	-1	-0.5	0	0.5	-1	1	0	1	0	0	0	1	0
	86	0	-0.333333	0	0	1	-0.333333	0.5	0	0	-1	0	0	-0.5	0.5	-1	0.5	0	0	0.5	-0.5	0.5	0	-0.5	0	0	-0.5	0	0	-0.5	0	0.5	0	-0.5	-0.5	-0.5	0	0	-0.5	0.5	0.5
	87	-0.5	-0.333333	1	-1	0.333333	-1	0.5	0	0	0	-0.5	-1	0.5	0.5	0.5	-1	-0.5	0	0.5	-1	-1	0.5	-0.333333	0	-1	0	0	-1	-0.5	0.5	0	-1	0	-1	0.5	-0.5	1	-0.5	0	-1
	88	0	-1	-0.5	0	0.333333	0	0	-1	-1	-0.333333	1	-0.333333	-0.5	0.5	0	0	-1	0	-0.5	-0.5	0.5	0	0.5	1	-1	-0.5	-0.333333	-1	0.333333	-0.333333	0	-1	0	-0.5	1	0.333333	0	0	0.5	0.333333
	89	0.5	0.333333	0.5	0	-0.333333	-1	0	-0.5	-0.5	1	0.5	0.5	0	0.5	1	-0.5	-0.5	-0.333333	0.5	0	-1	0.5	0	-1	0	0	0	0.5	-0.5	0.5	0.5	0.5	0	-0.5	1	0.333333	0	0.5	0	0
	90	0	0	0.333333	-0.333333	-1	-1	-0.5	1	0	-0.333333	1	1	0	-1	0.333333	0	0	0	-1	1	-0.5	-0.333333	-0.5	-0.5	1	0	-0.333333	1	-1	0.333333	0.5	0.5	-0.333333	-1	0.5	-0.333333	0.5	0	-0.333333	-1
	91	-0.5	-0.333333	0	0	-0.333333	-0.333333	-1	0	0	-0.5	0	-0.5	0	-0.333333	-1	0	-0.5	0.5	1	0.5	-0.5	0.5	-0.5	-1	0.5	-0.5	-1	-1	0.5	0.5	0	-0.5	0	-0.5	0.5	0	-0.5	-0.5	0	-0.5
	92	0	-0.333333	0.5	0	-0.333333	0.333333	-0.5	0	0	-0.5	0.5	-0.5	0.5	0	-0.333333	-0.5	-1	-0.5	0	0	0.5	0	0	-0.5	-0.5	0	0	-0.5	-0.5	0	0.5	-0.5	0.5	0	0.5	1	0.5	0	0	0.5
	93	-1	-0.333333	-0.5	-0.5	-1	0.333333	0.5	0	0	-0.5	0	0	0	0	0	0	-1	-0.5	-1	-0.5	0.5	0	0	1	0.5	-1	-1	-1	0	0	-0.5	-0.5	-0.5	0	0	0.5	0	0	0	0.5
	94	0	0.333333	1	-1	0.333333	0.333333	0.5	-1	-0.5	0	1	-0.5	0.5	0	1	-0.5	0	0	1	0.5	0	0.5	0	-0.5	-1	0	0.5	-1	0	1	1	-1	1	-0.5	1	-1	0.5	-0.5	1	-0.5
	95	-0.5	-0.333333	-0.5	0	1	-0.333333	0	0.5	0	-0.5	0.5	0.5	-0.5	0	-1	0	0.5	0	0.5	0	0.5	0	-0.5	0	0	1	0	-1	-0.5	0.5	0.5	-0.5	0.5	-1	0.5	1	-0.5	0.5	0.5	0
	96	0	1	0.5	0	0.333333	0.333333	0.5	-0.5	0	-0.5	-0.5	-1	0.5	-0.5	-0.5	-0.5	0	0.5	0	-0.5	0	0.5	0	-0.5	0	0	0	-0.5	0	0.5	0.5	-0.5	0	0	-0.5	-1	0.5	0.5	0	0.5
	97	0.5	-0.333333	0.5	-0.5	-0.333333	-1	1	0.5	1	0.5	0.5	0	1	-0.5	0	0	0	0	-0.5	0.333333	0	-0.5	-0.5	-0.5	0.333333	1	0.5	-0.5	0	0.5	0	0	1	-0.5	0	0	0.5	0.5	0.5	0.5
	98	0.333333	-0.333333	0	0	-1	1	0.333333	1	0	0	0.5	-0.5	0	0	-0.5	0.333333	0	-1	0	0.5	0.5	0.5	-0.5	-0.5	0	0	-0.5	-1	0	0	-1	-0.5	0	-1	0	-0.5	0.5	0	1	-0.5
	99	0.5	-0.333333	0.5	-0.5	-0.333333	0.333333	0	-0.5	-0.5	0.5	1	0.5	0	0	0.5	-0.5	-0.5	0	0.5	0	0	0	-0.5	0	-0.5	-0.5	-1	-1	-0.5	0	1	0	1	0	0.5	-1	0	0	1	0
	100	1	0.333333	0.5	-0.5	0.333333	-0.333333	0.5	0	0.5	0.5	-0.5	1	0	1	0	-1	0.5	0	0	1	0.5	0	-0.5	0.5	1	0.5	0	0	0	1	0.5	0	1	1	0	1	-0.5	0.5	1	-0.5

## Sheet: Filler Routes
a -1 is south select		East/West Routes		North/South Routes		a -1 is west select
a 1 is north select		North Longer	South Longer	East Longer	West Longer	a 1 is east select
		filler_e-w_ls01	filler_e-w_sl01	filler_n-s_sl01	filler_n-s_ls01
		filler_e-w_ls02	filler_e-w_sl02	filler_n-s_sl02	filler_n-s_ls02
		filler_e-w_ls03	filler_e-w_sl03	filler_n-s_sl03	filler_n-s_ls03
		filler_e-w_ls04	filler_e-w_sl04	filler_n-s_sl04	filler_n-s_ls04
		filler_e-w_ls05	filler_e-w_sl05	filler_n-s_sl05	filler_n-s_ls05
		filler_e-w_ls06	filler_e-w_sl06	filler_n-s_sl06	filler_n-s_ls06
		filler_w-e_sl01	filler_w-e_ls01	filler_s-n_ls01	filler_s-n_sl01
		filler_w-e_sl02	filler_w-e_ls02	filler_s-n_ls02	filler_s-n_sl02
		filler_w-e_sl03	filler_w-e_ls03	filler_s-n_ls03	filler_s-n_sl03
		filler_w-e_sl04	filler_w-e_ls04	filler_s-n_ls04	filler_s-n_sl04
		filler_w-e_sl05	filler_w-e_ls05	filler_s-n_ls05	filler_s-n_sl05
		filler_w-e_sl06	filler_w-e_ls06	filler_s-n_ls06	filler_s-n_sl06
	1	-0.454545	0.5	-0.0909091	-0.0909091
	2	-1	1	-1	1
	3	-0.818182	0.166667	-1	1
	4	-0.333333	0.666667	-0.333333	0.5
	5	-1	1	-1	1
	6	-0.666667	0.833333	-0.833333	1
	7	-0.818182	1	-1	1
	8	-1	1	-0.818182	0.777778
	9	-0.833333	1	-1	0.666667
	10	-1	1	-1	1
	11	-1	1	-0.833333	0.666667
	12	-0.666667	0.666667	0.166667	0
	13	-0.272727	1	-1	0.636364
	14	-0.5	1	-0.777778	0.8
	15	-1	1	-1	0.833333
	16	-0.833333	1	-1	1
	17	-1	1	-1	1
	18	-1	1	-1	1
	19	-0.2	0.2	-0.666667	-0.636364
	20	-1	1	-1	1
	21	-1	1	-1	0.833333
	22	-0.833333	1	-1	1
	23	-1	1	-1	1
	24	-0.6	0.142857	-0.555556	0.2
	25	-1	1	-1	0.833333
	26	-0.5	1	-0.666667	0.666667
	27	-0.636364	0.2	0	1
	28	-0.818182	1	-1	1
	29	-0.272727	0.5	-0.5	0.5
	30	0	0.5	-0.333333	0
	31	-1	1	-0.666667	0.666667
	32	-0.5	1	-0.833333	0.666667
	33	-1	1	-1	1
	34	-1	1	-1	1
	35	-0.4	0.636364	-0.714286	0.2
	36	-1	1	-0.833333	0.5
	37	-0.333333	0.833333	0.166667	-0.333333
	38	-0.636364	0.833333	-0.666667	0.636364
	39	-0.25	0	0.2	1
	40	-0.166667	0.666667	0	0.666667
	41	-0.777778	1	-1	0.818182
	42	-0.333333	1	-0.166667	0.166667
	43	-0.5	1	-0.333333	0
	44	-0.666667	1	-1	0.833333
	45	-0.666667	1	-1	0.818182
	46	-1	1	-1	0.833333
	47	-0.5	1	0	0.333333
	48	-0.777778	1	-1	1
	49	0	0.0909091	0.636364	0.272727
	50	-0.5	0.666667	0	0.833333
	51	-1	1	-1	1
	52	-1	0.833333	-0.5	1
	53	-0.666667	0.666667	-0.5	0.833333
	54	-0.5	0.333333	-0.166667	0.666667
	55	-1	1	-1	1
	56	-1	1	-0.833333	1
	57	-1	1	-1	1
	58	-0.833333	1	-1	0.833333
	59	-0.5	1	-0.666667	0.333333
	60	-0.666667	1	-0.833333	0.833333
	61	-0.833333	0.833333	-0.5	0.833333
	62	-0.833333	0.833333	-1	0.833333
	63	0.0909091	1	-0.666667	0.636364
	64	-0.5	1	-0.333333	0.333333
	65	-0.333333	0.833333	-0.5	0.833333
	66	-0.666667	0.818182	-1	0.454545
	67	-1	1	-1	0.833333
	68	-1	1	-1	1
	69	-0.166667	0.5	0.333333	-0.333333
	70	-0.833333	-0.166667	0.166667	0.333333
	71	-1	1	-0.6	0.833333
	72	-0.5	1	-0.333333	0.5
	73	-0.666667	1	-1	0.5
	74	-0.833333	1	-1	0.833333
	75	-1	0.833333	-0.666667	0.833333
	76	-0.833333	1	-1	0.8
	77	-0.833333	1	-1	1
	78	-1	1	-0.833333	1
	79	-0.833333	1	-1	1
	80	0.333333	0.5	-0.5	0.666667
	81	-1	0.5	-1	0.666667
	82	0.166667	1	-0.166667	0
	83	-0.833333	1	-0.166667	0.5
	84	-1	0.833333	-0.6	1
	85	-0.5	1	-0.666667	1
	86	-1	0.833333	-1	0.5
	87	-0.833333	0.833333	-0.833333	1
	88	-0.636364	0.2	-0.6	0.272727
	89	-1	1	-0.833333	1
	90	-1	1	-1	1
	91	-1	1	-1	1
	92	-0.333333	1	-0.333333	0.5
	93	-0.166667	0	0.333333	0.454545
	94	-0.833333	1	-1	0.833333
	95	-1	1	-1	1
	96	-1	1	-1	1
	97	-0.833333	0.833333	-1	0.833333
	98	-0.833333	1	-1	0.833333
	99	-1	0.666667	-0.5	1
	100	-0.666667	1	-1	1
